# Supplementary material for: Expression of virus-like particles (VLPs) of foot-and-mouth disease virus (FMDV) using Saccharomyces cerevisiae
Source: Springer Nature journal article supplement (doi:10.1007/s00253-023-12902-9), 2024-01-09
Supplement: MOESM1 [file 253_2023_12902_MOESM1_ESM.pdf]

## Supplementary Information

**Journal Name:** Applied Microbiology and Biotechnology

**Article Title:** Expression of virus-like particles (VLPs) of foot-and-mouth disease virus (FMDV) using *Saccharomyces cerevisiae*

**Author name and Affiliations:** Ngoc My Tieu Le<sup>1</sup> · Kum-Kang So<sup>2</sup> · Jeesun Chun<sup>2</sup> · Dae-Hyuk Kim<sup>1,2</sup>

<sup>1</sup>Department of Bioactive Material Sciences, Jeonbuk National University, Jeonju, Jeollabuk-do, Republic of Korea

<sup>2</sup>Institute for Molecular Biology and Genetics, Department of Molecular Biology, Jeonbuk National University, Jeonju, Jeollabuk-do, Republic of Korea

Ngoc My Tieu Le, Kum-Kang So and Jeesun Chun contributed equally to this work and share first authorship.

### \* Correspondence

Dae-Hyuk Kim, Department of Bioactive Material Sciences, Institute for Molecular Biology and Genetics, Department of Molecular Biology, Jeonbuk National University, Jeonju, 54896, Republic of Korea.

E-mail: dhkim@jbnu.ac.kr

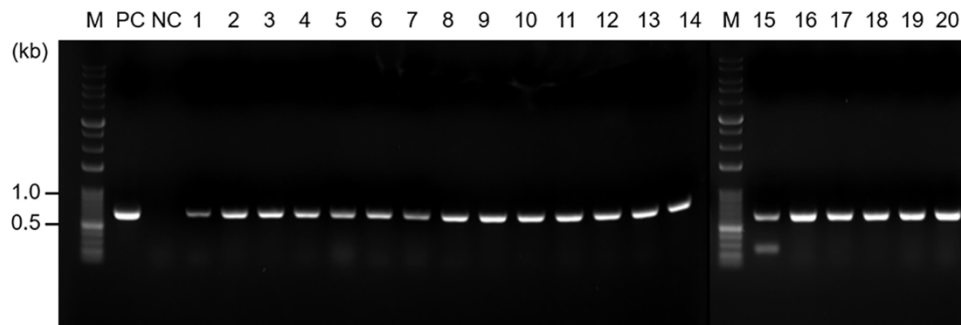

**Fig. S1** Colony PCR of yeast transformants. Agarose gel electrophoresis was conducted to show the expected 640-bp PCR amplicons using primers for amplification of the 3C sequence. Lanes 1-20 contain the products of the colony PCR using putative transformants as templates. PC contains the PCR product from the reaction using pYEGPD-P1-2A-3C as a template and NC contains the PCR products using mock (vector only) transformant. Numbers on the left indicate the size in kb

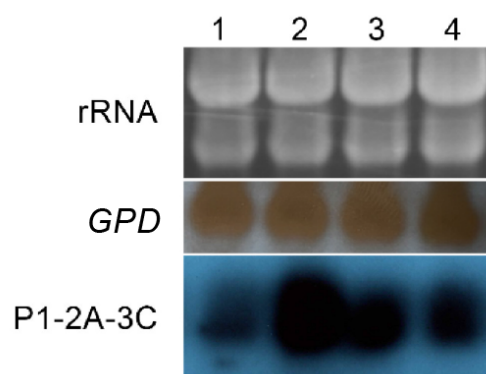

**Fig. S2** Analysis of temporal expression of the P1-2A-3C transcript from representative transformant TpYEGPD-P1-2A-3C-3. Lanes 1-4 contain 30  $\mu$ g each of total RNA from the 1-, 2-, 3- and 5-day cultures of the selected transformant, respectively. The rRNA is shown to indicate an equal loading amount of RNA and *GPD* transcription is shown as an internal control

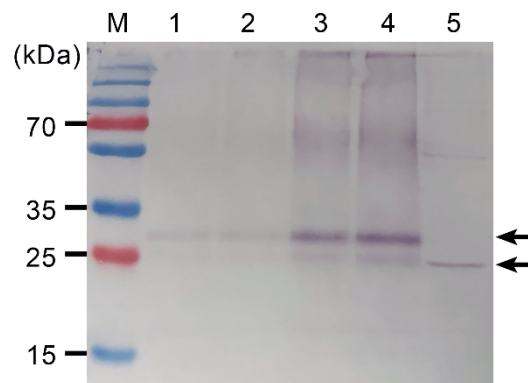

**Fig. S3** Western blot analysis of yeast expressing P1-2A-3C polyprotein to measure VLP. Western blot analysis of serially diluted-known amount of *E. coli*-expressed VP3 was compared with those of yeast expressing VP3. Lanes 1-4 contain 0.5, 1.0, 2.0, and 3.0  $\mu\text{g}$  of *E. coli*-expressed VP3 protein. Densitometry of cross-reacting band intensity was performed to estimate the protein amount

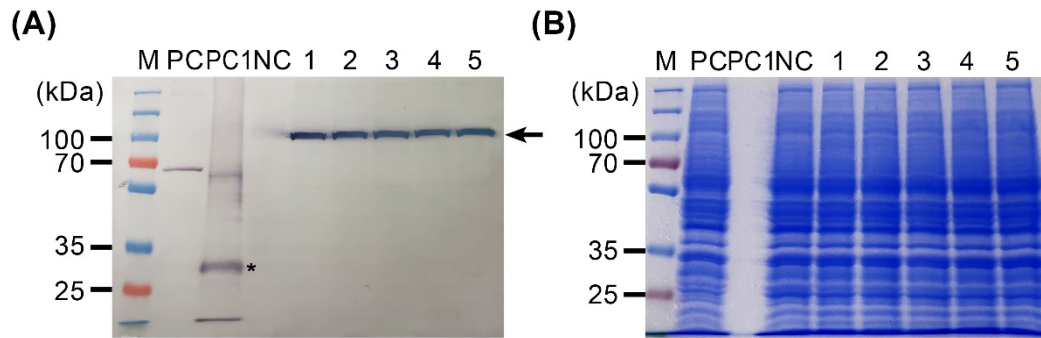

**Fig. S4** Expression analysis of yeast codon optimized P1 polyprotein. (A) Western blot analysis of yeast expressing P1 polyprotein using an antibody against VP3. PC: VP0-VP3 fusion of protein from yeast, PC1: VP3 protein from *E. coli*. NC: protein preparation from mock (vector only) transformant. Lanes 1-5 contain protein preparations from selected five yeast transformants cultured for 3 days at 30 °C. (B) A representative twin SDS-PAGE gel stained with Coomassie blue is shown to confirm an equal loading amount

**Table S1** List of primers used in this study

| Primer                 | Sequence (5' to 3')                            | Applications                            |
|------------------------|------------------------------------------------|-----------------------------------------|
| <i>Bam</i> HI-VP4-F    | <u>GGATCC</u> <b>AT</b> GGGAGCCGGTCAATCTAGCCCG | Cloning P1 and P1-2A-3C into pYEGPD-TER |
| <i>Bam</i> HI-VP2-F    | <u>GGATCC</u> GACAAGAAAACCGAAGAG               | Cloning VP2 into pQE-30                 |
| <i>Sal</i> I-VP2-R     | <u>GTCGAC</u> TTCTTGGAAGGGAATTCACC             | Cloning VP2 into pQE-30                 |
| <i>Sal</i> I-TAA-VP1-R | <u>GTCGAC</u> <b>TT</b> ATTGTTCCACTGGTGCAAC    | Cloning P1 into pYEGPD-TER              |
| <i>Bam</i> HI-3C-F     | <u>GGATCC</u> TCTGGTGCACCAACCGACT              | Cloning 3C into pQE-30                  |
| <i>Sal</i> I-TAA-3C-R  | <u>GTCGAC</u> <b>TT</b> ATTCATGGTGTGGTTCA      | Cloning P1-2A-3C into pYEGPD-TER        |
| <i>Sal</i> I-3C-R      | <u>GTCGAC</u> TTTCATGGTGTGGTTCA                | Cloning 3C into pQE-30                  |
| <i>Bam</i> HI-VP1-F    | <u>GGATCC</u> ACTACCTCCGCCGGCG                 | Cloning VP1 into pColdII                |
| <i>Sal</i> I-VP1-R     | <u>GTCGAC</u> TTGTTCCACTGGTGCAAC               | Cloning VP1 into pColdII                |
| <i>Bam</i> HI-VP3-F    | <u>GGATCC</u> GGGATCTTTCCAGTGGC                | Cloning VP3 into pQE-30                 |
| <i>Sal</i> I-VP3-R     | <u>GTCGAC</u> CTGTGTTCTAGCATCC                 | Cloning VP3 into pQE-30                 |
| GPD probe F            | GTTTCCCATGACGACAAGCACA                         | Probe for Northern blot analysis        |
| GPD probe R            | CAACTTGACGAACTTTGGAGACAAT                      | Probe for Northern blot analysis        |

Underlines indicate recognizing sequences for corresponding restriction enzymes.

Bolds indicate the start and stop codon sequences.
